# Supplementary material for: Alkali and alkaline earth metal salts of tetrazolone: structurally interesting and excellently thermostable
Source: Royal Society of Chemistry journal article supplement (doi:10.1039/c7dt01179b), 2017-01-01
Supplement: c7dt01179b1.pdf [file c7dt01179b1.pdf]

## Supporting Information

### Alkali and Alkaline Earth Metal Salts of Tetrazolone: Structurally Interesting and Excellentlly Thermostable

Piao He<sup>a</sup>, Le Wu<sup>a</sup>, Jin-Ting Wu<sup>a</sup>, Xin Yin<sup>a</sup>, Michael Gozin<sup>b</sup>, Jian-Guo Zhang<sup>\*a</sup>

#### Table of contents

1. Experimental section
2. Packing schemes
3. Crystallographic data
4. Hydrogen bonds
5. References

#### 1. Experimental section

**General:** All chemicals were used as obtained from commercial suppliers. Melting and decomposition points were determined by differential scanning calorimetry (DSC) with a Pekin Elmer (PE) STA-6000 apparatus at a heating rate of 10 °C min<sup>-1</sup> apparatus. Calorimetric measurements were performed with a Parr-6200 bomb calorimeter. <sup>1</sup>H and <sup>13</sup>C NMR spectra were recorded using a Bruker instrument. The chemical shifts quoted in ppm relative to tetramethylsilane (<sup>1</sup>H, <sup>13</sup>C). Infrared spectra were measured using a Nicolet Nexus 470 FT-IR spectrometer as KBr pellets. Mass spectra were measured at an Agilent 500-MS. Elemental analysis was performed on an Elementar Vario El III analyzer. Impact sensitivities were tested by fall hammer apparatus applying standard staircase method using a 2 kg drop weight and the results were reported in terms of height for 50% probability of explosion (h50%). Collection of XRD data was performed on a Rigaku Saturn 724+ CCD diffractometer equipped with graphite monochromatized MoK $\alpha$  radiation. The structure was solved with SHELXS-97<sup>1</sup> refined with SHELXL-97<sup>2</sup>. The non-hydrogen atoms were refined anisotropically and the hydrogen atoms were located and freely refined.

CCDC-1018902 (1), CCDC-1018900 (2), CCDC-1018911 (3), CCDC-1018907 (4), CCDC-1018908 (5), CCDC-1018915 (6), CCDC-1018917 (7), CCDC-1018916 (8), CCDC-1018912 (9) contain the supplementary crystallographic data, which can be obtained free of charge from The Cambridge Crystallographic Data Centre via [www.ccdc.cam.ac.uk/data\\_request/cif](http://www.ccdc.cam.ac.uk/data_request/cif).

---

\* Corresponding authors: Jian-Guo Zhang, Tel & Fax: +86 10 68918091.  
E-mail: zjgbit@bit.edu.cn

**Caution!** All of these investigated compounds are potentially explosive energetic materials, thus this necessitates additional meticulous safety precautions (ear plugs, face shield and Kevlar gloves etc).

### **Tetrazolone (TO)**

Tetrazolone was obtained in three improved steps from commercially available benzyl isocyanate (Scheme 2). The reaction with trimethylsilane azide under the reflux of anhydrous toluene results in formyl benzylamine azide. Then the obtained oily liquid was cyclized under special conditions (trimethyl chlorosilane and triethylamine) to form 1-benzyl tetrazolone. Final catalytic hydrogenolysis with Pd/C catalyst gave the target product.

### **Lithium 5-oxotetrazolate hydrate (1)**

Tetrazolone (86 mg, 1 mmol) was suspended in water (2 mL). The mixture was heated to reflux (70~80°C) to obtain a clear solution. The lithium hydrate (42 mg, 1 mmol) was added and the solution was cooled down to room temperature causing the white precipitation of the salt in good yield (94%). DSC (10 °C min<sup>-1</sup>): 280.1 °C (dec); IR(KBr, cm<sup>-1</sup>): 3391.39, 3308.11, 3136.41, 3045.42, 2820.18, 2696.64, 2542.46, 2512.72, 2227.61, 2127.57, 1668.61, 1637.25, 1430.98, 1343.58, 1281.10, 1171.34, 1094.44, 1065.13, 1014.26, 791.93, 757.20, 686.42, 641.46, 548.03, 468.63, 446.75; <sup>13</sup>CNMR(400 MHz, DMSO-d<sub>6</sub>): 166.5; MS(ESI<sup>-</sup>): 84.95(CHN<sub>4</sub>O<sup>-</sup>); EA: Calcd C 10.92%, H2.75 %, N 50.93%; found C11.07 %, H 2.58%, N50.07 %.

### **Sodium 5-oxotetrazolate hydrate (2)**

Tetrazolone (86 mg, 1 mmol) was suspended in water (2 mL). The mixture was heated to obtain a clear solution. Sodium carbonate (53 mg, 0.5 mmol) was added and the solution was cooled down to room temperature. The colorless crystal was obtained by filtration and dried under vacuum (92.3%). DSC (10 °C min<sup>-1</sup>): 255.2 °C (dec); IR (KBr, cm<sup>-1</sup>): 3566.67, 3368.33, 3244.31, 3103.67, 3008.42, 2827.40, 2529.97, 2485.87, 2319.42, 1648.56, 1439.50, 1324.46, 1275.89, 1171.15, 1102.84, 1060.24, 1006.55, 944.77, 824.29, 799.81, 765.43, 692.10, 646.78, 569.70, 510.93, 455.69; <sup>13</sup>CNMR(400 MHz, DMSO-d<sub>6</sub>): 166.9; MS(ESI<sup>-</sup>): 84.95(CHN<sub>4</sub>O<sup>-</sup>); EA: Calcd C 9.53%, H2.40 %, N 44.45%; found C9.87 %, H 2.48%, N42.37 %.

### **Potassium 5-oxotetrazolate (3)**

Tetrazolone (86 mg, 1 mmol) was suspended in water (2 mL). The mixture was heated to obtain a clear solution. Potassium carbonate (69 mg, 0.5 mmol) was added and the solution was cooled down to room temperature. The white powder was collected by filtration and dried under vacuum (96.7%). DSC (10 °C min<sup>-1</sup>): 245.8 °C (dec); IR (KBr, cm<sup>-1</sup>): 3566.10, 3457.92, 3381.97, 3247.63, 3115.96, 2985.67, 2819.74, 2689.87, 2527.90, 1731.48, 1671.85, 1615.03, 1460.42, 1339.42, 1311.30, 1268.53, 1156.24, 1132.24, 1086.64, 1059.50, 993.87, 970.76, 889.80, 780.95,

768.41, 738.90, 689.11, 537.82, 495.87;  $^{13}\text{C}$ NMR(400 MHz, DMSO- $d_6$ ): 161.4; MS(ESI): 84.95( $\text{CHN}_4\text{O}^-$ ); EA: Calcd C 9.67%, H 0.81 %, N 45.13%; found C 9.89 %, H 0.93%, N 43.82 %.

#### **Rubidium 5-oxotetrazolate (4)**

Tetrazolone (86 mg, 1 mmol) was suspended in water (2 mL). The mixture was heated to obtain a clear solution. Rubidium carbonate (115 mg, 0.5 mmol) was added and the solution was cooled down to room temperature. The filtration and dried under vacuum leave the colorless crystals (88.8%). DSC (10 °C  $\text{min}^{-1}$ ): 184.9 °C (dec); IR (KBr,  $\text{cm}^{-1}$ ): 3395.36, 3117.48, 2980.15, 2783.07, 2689.80, 2509.82, 2291.85, 1970.87, 1662.36, 1468.82, 1308.28, 1263.69, 1148.47, 1091.22, 1053.07, 978.47, 847.67, 769.27, 684.28, 512.36;  $^{13}\text{C}$ NMR(400 MHz, DMSO- $d_6$ ): 163.4; MS(ESI): 84.95( $\text{CHN}_4\text{O}^-$ ); EA: Calcd C 7.04%, H 0.59 %, N 32.86%; found C 7.13 %, H 0.64%, N 30.45 %.

#### **Cesium 5-oxotetrazolate (5)**

Tetrazolone (86 mg, 1 mmol) was suspended in water (2 mL). The mixture was heated to obtain a clear solution. Caesium hydroxide (150 mg, 1 mmol) was added and the solution was cooled down to room temperature. The filtration and dried under vacuum crystalline colorless solid (88.5%). DSC (10 °C  $\text{min}^{-1}$ ): 229.5 °C (dec); IR (KBr,  $\text{cm}^{-1}$ ): 3434.85, 3106.69, 2973.49, 2769.54, 2684.95, 2486.73, 1653.43, 1469.27, 1455.55, 1372.00, 1306.86, 1275.39, 1145.08, 1091.52, 1055.24, 973.08, 867.51, 771.59, 683.67, 509.59;  $^{13}\text{C}$ NMR(400 MHz, DMSO- $d_6$ ): 166.1; MS(ESI): 84.95( $\text{CHN}_4\text{O}^-$ ); EA: Calcd C 5.51%, H 0.46 %, N 25.71%; found C 5.75 %, H 0.54%, N 23.46 %.

#### **Magnesium 5-oxotetrazolate tetrahydrate (6)**

Tetrazolone (172 mg, 2 mmol) was suspended in water (5 mL). The mixture was heated to reflux in order to dissolve the acid. After obtaining a clear solution magnesium oxide (40 mg, 1 mmol) was added. The solution was reflux for 1h and followed by filtration of the hot solution. The filtrate was then cooled down to room temperature and the solid was precipitated in a good yield (92.7%). DSC (10 °C  $\text{min}^{-1}$ ): 271.5 °C (dec); IR (KBr,  $\text{cm}^{-1}$ ): 3799.24, 3708.6, 3625.67, 3563.96, 3558.17, 3550.46, 3542.74, 3521.53, 3508.03, 3500.31, 3479.1, 2792.54, 2690.32, 2316.19, 1681.69, 1639.27, 1405.91, 1324.91, 1294.06, 1168.7, 1099.27, 1035.63, 755.99, 698.13, 592.06, 530.35, 405.00;  $^{13}\text{C}$ NMR(400 MHz, DMSO- $d_6$ ): 163.1; MS(ESI): 84.95( $\text{CHN}_4\text{O}^-$ ); EA: Calcd C 9.02%, H 3.78 %, N 42.05%; found C 9.16 %, H 3.85%, N 41.02 %.

#### **Calcium 5-oxotetrazolate pentahydrate (7)**

Tetrazolone (172 mg, 2 mmol) was suspended in water (5 mL). The mixture was heated to reflux in order to a clear solution. Calcium hydroxide (74 mg, 1 mmol) was added. The solution was reflux for 1h and followed by filtration

of the hot solution. The filtrate was then cooled down to room temperature and the colorless crystalline was obtained (82.4%). DSC (10 °C min<sup>-1</sup>): 328.2 °C (dec); IR (KBr, cm<sup>-1</sup>): 3585.17, 3563.96, 3239.96, 1639.27, 1612.27, 1373.13, 1265.13, 1058.77, 800.35, 746.35, 682.71, 499.49; <sup>13</sup>CNMR(400 MHz, DMSO-d<sub>6</sub>): 165.0; MS(ESI<sup>-</sup>): 84.95(CHN<sub>4</sub>O<sup>-</sup>); EA: Calcd C 8.00%, H 4.03 %, N 37.32%; found C 8.09 %, H 4.10%, N 37.25 %.

#### **Strontium 5-oxotetrazolate pentahydrate (8)**

Tetrazolone (172 mg, 2 mmol) was suspended in water (5 mL). The mixture was heated to reflux in order to a clear solution. Strontium carbonate (147 mg, 1 mmol) was added. The solution was reflux for 2h and followed by filtration of the hot solution. The filtrate was then cooled down to room temperature and the colorless crystalline was obtained (79.3%). DSC (10 °C min<sup>-1</sup>): 225.0 °C (dec); IR (KBr, cm<sup>-1</sup>): 3853.24, 3670.03, 3500.31, 3417.39, 2966.11, 2782.89, 2320.04, 1697.12, 1608.41, 1421.34, 1330.70, 1272.84, 1261.27, 1153.27, 1097.34, 1054.92, 997.06, 788.78, 769.49, 694.28, 622.92, 538.06; <sup>13</sup>CNMR(400 MHz, DMSO-d<sub>6</sub>): 165.6; MS(ESI<sup>-</sup>): 84.95(CHN<sub>4</sub>O<sup>-</sup>); EA: Calcd C 6.91%, H 3.48 %, N 32.22%; found C 7.15 %, H 3.51%, N 31.02 %.

#### **Barium 5-oxotetrazolate dehydrate (9)**

Tetrazolone (172 mg, 2 mmol) was suspended in water (5 mL). The mixture was heated to reflux in order to a clear solution. Barium carbonate (197 mg, 1 mmol) was added. The solution was reflux for 2h and followed by filtration of the hot solution. The filtrate was then cooled down to room temperature and the colorless crystalline was obtained (82.2%). DSC (10 °C min<sup>-1</sup>): 227.8 °C (dec); IR (KBr, cm<sup>-1</sup>): 3851.31, 3392.32, 2364.40, 1812.84, 1605.84, 1477.27, 1459.91, 1338.41, 1259.34, 1126.27, 1064.56, 1012.49, 983.56, 931.49, 784.92, 773.35, 700.06, 638.35, 512.99, 441.64; <sup>13</sup>CNMR(400 MHz, DMSO-d<sub>6</sub>): 164.5; MS(ESI<sup>-</sup>): 84.95(CHN<sub>4</sub>O<sup>-</sup>). EA: Calcd C 6.99%, H1.76 %, N 32.63%; found C 7.24 %, H1.88%, N29.74 %.

## **2. Packing schemes**

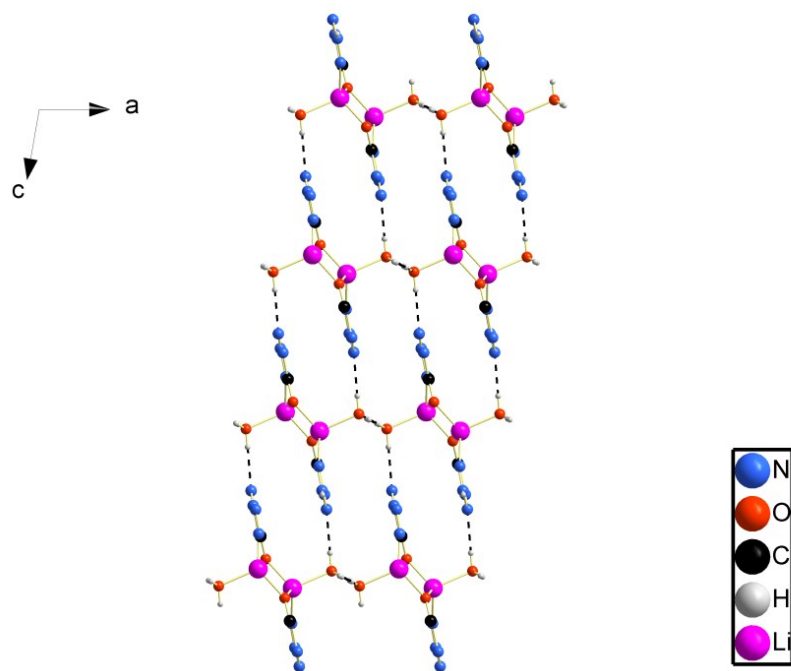

**Figure S1** Packing scheme of compound 1 view along b axis

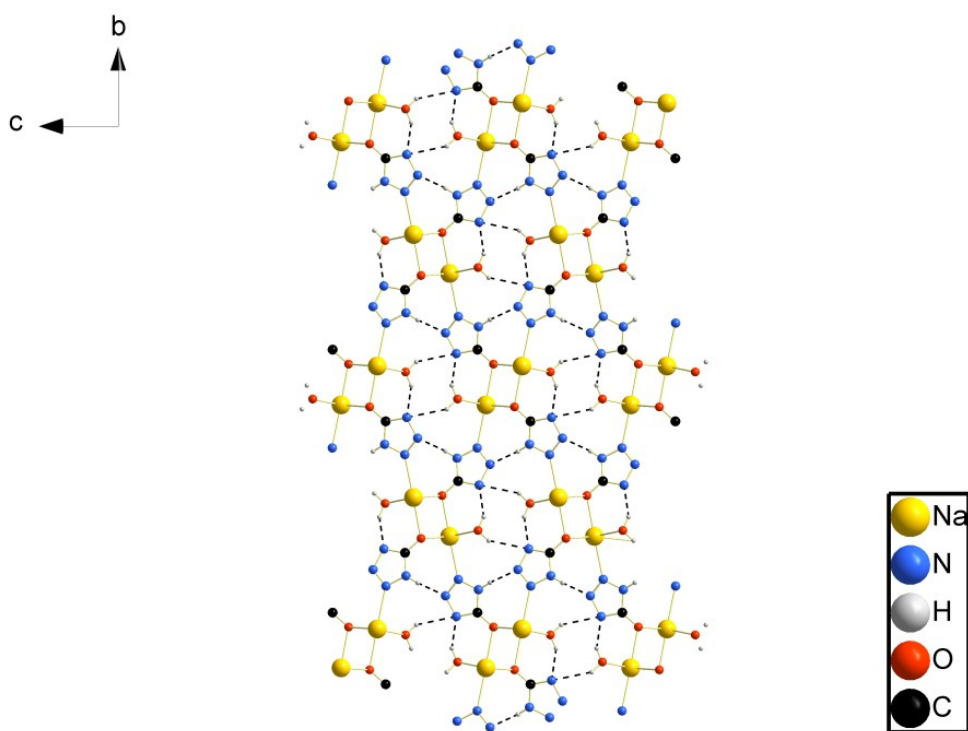

**Figure S2** Packing scheme of compound 2 view along a axis

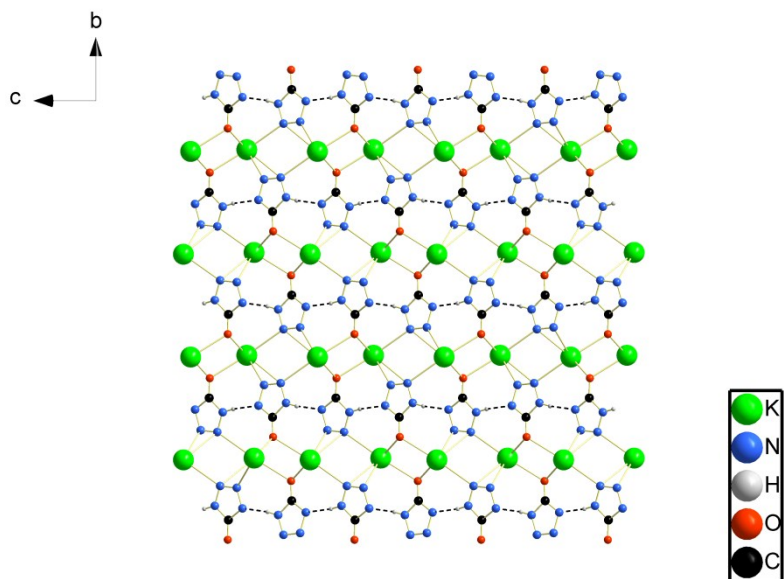

**Figure S3** Packing scheme of compound **3** view along a axis

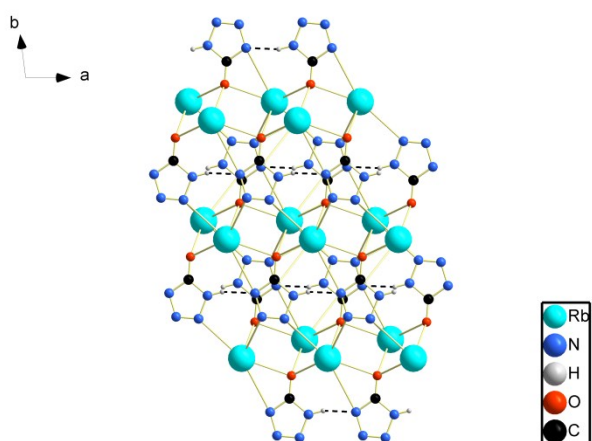

**Figure S4** Packing scheme of compound **4** view along c axis

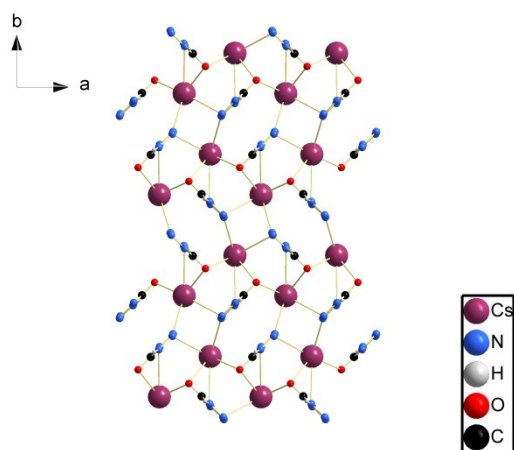

**Figure S5** Packing scheme of compound **5** view along c axis

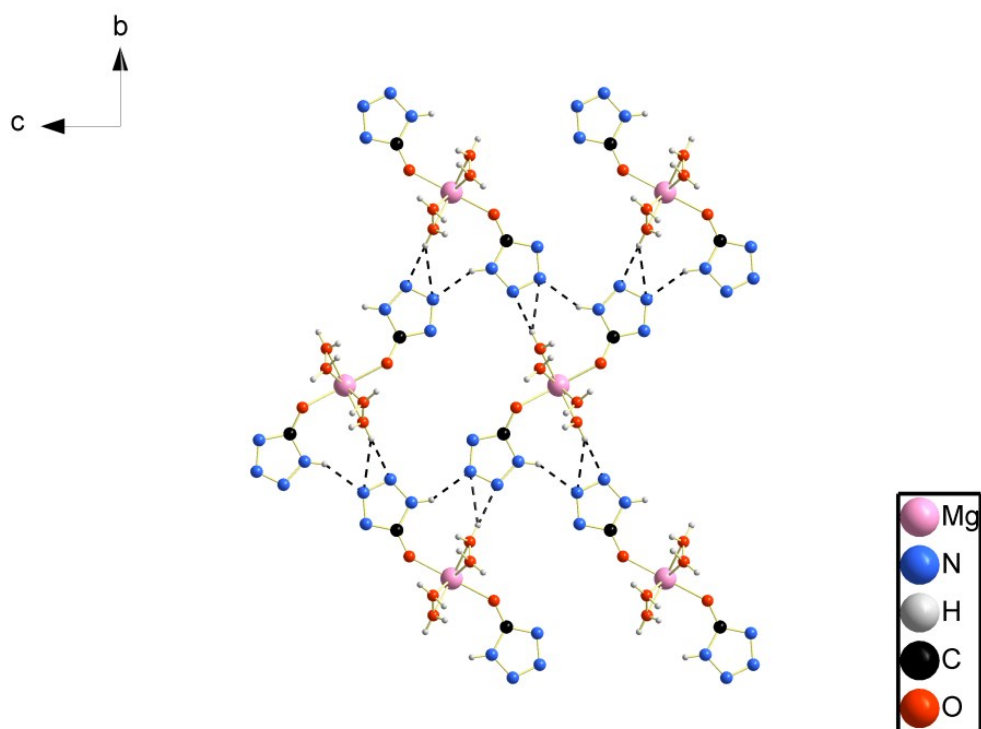

Figure S6 Packing scheme of compound 6 view along a axis

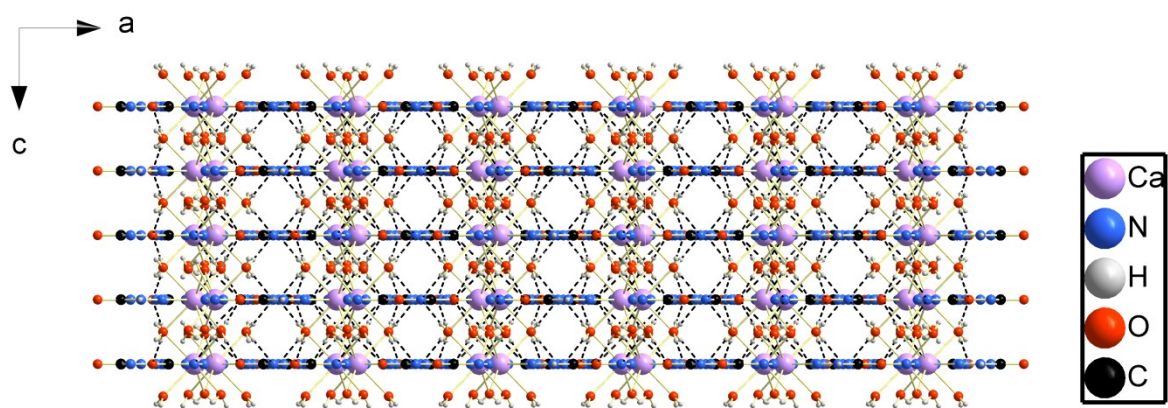

Figure S7 Packing scheme of compound 7 view along b axis

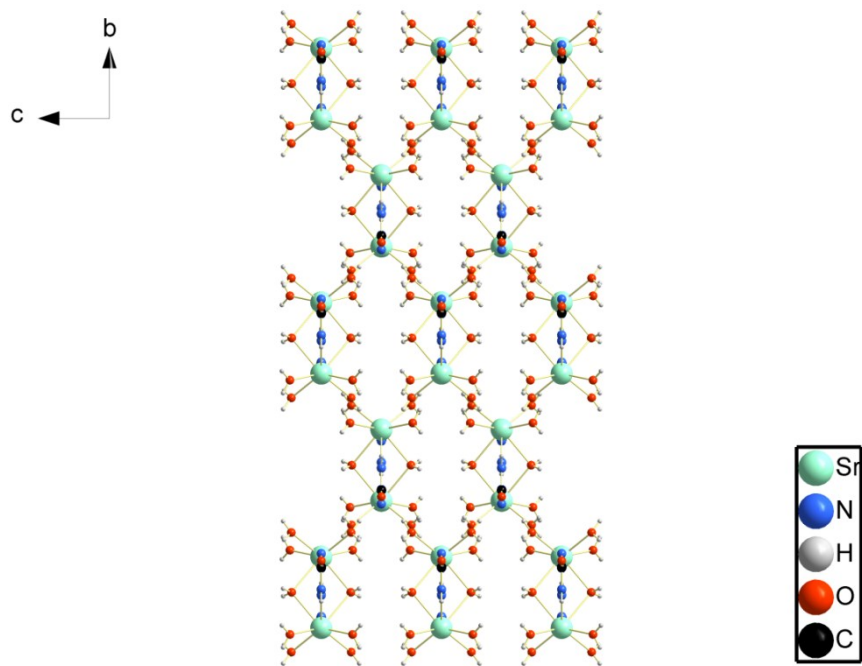

Figure S8 Packing scheme of compound 8 view along a axis

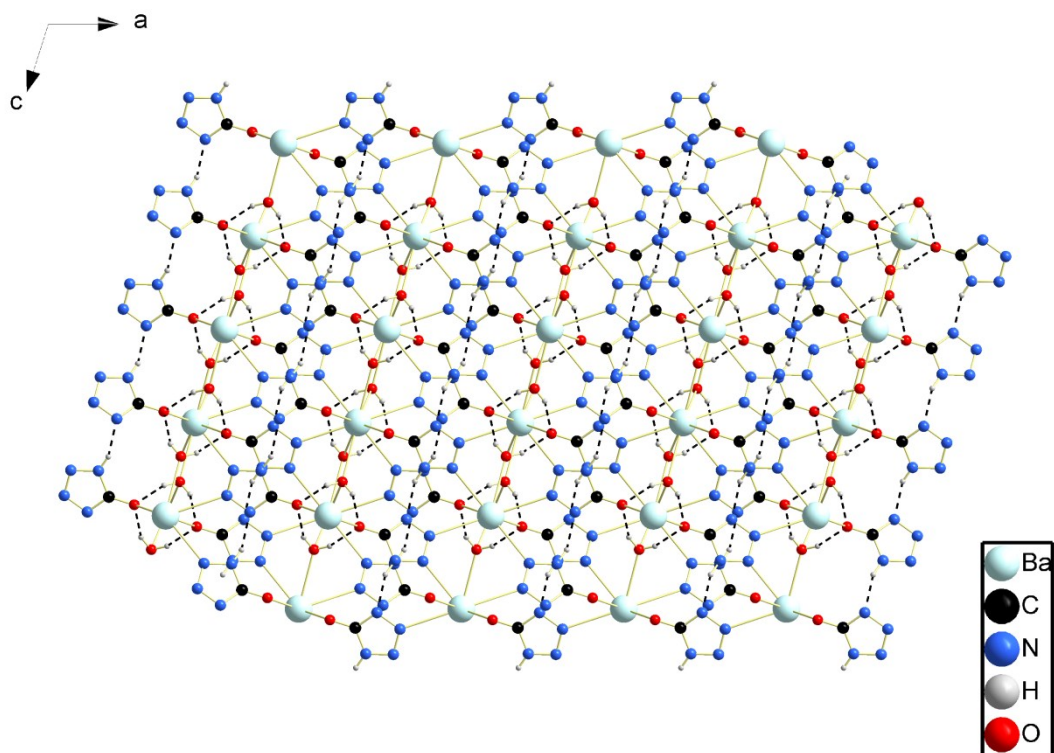

Figure S9 Packing scheme of compound 9 view along b axis

### 3. Crystallographic data



**Table 1** Crystallographic data and structure refinement details for compounds 1-9

| Compound                                                                            | 1·H <sub>2</sub> O                              | 2·H <sub>2</sub> O                              | 3                      | 4                    | 5                      | 6·4H <sub>2</sub> O                                            | 7·5H <sub>2</sub> O·TO(H <sub>2</sub> O<br>)                                   | 8·5H <sub>2</sub> O                                             | 9·2H <sub>2</sub> O                                           |
|-------------------------------------------------------------------------------------|-------------------------------------------------|-------------------------------------------------|------------------------|----------------------|------------------------|----------------------------------------------------------------|--------------------------------------------------------------------------------|-----------------------------------------------------------------|---------------------------------------------------------------|
| Formula                                                                             | CH <sub>3</sub> LiN <sub>4</sub> O <sub>2</sub> | CH <sub>3</sub> N <sub>4</sub> NaO <sub>2</sub> | CHKN <sub>4</sub> O    | CHN <sub>4</sub> ORb | CHCsN <sub>4</sub> O   | C <sub>2</sub> H <sub>10</sub> MgN <sub>8</sub> O <sub>6</sub> | C <sub>5</sub> H <sub>28</sub> Ca <sub>2</sub> N <sub>20</sub> O <sub>16</sub> | C <sub>2</sub> H <sub>12</sub> N <sub>8</sub> O <sub>7</sub> Sr | C <sub>2</sub> H <sub>6</sub> BaN <sub>8</sub> O <sub>4</sub> |
| Formula weight                                                                      | 110.01                                          | 126.06                                          | 124.16                 | 170.53               | 217.97                 | 266.49                                                         | 704.6                                                                          | 347.82                                                          | 343.49                                                        |
| Crystal system                                                                      | Monoclinic                                      | Monoclinic                                      | Monoclinic             | Triclinic            | Orthorhombic           | Orthorhombic                                                   | Orthorhombic                                                                   | Orthorhombic                                                    | Monoclinic                                                    |
| Space group                                                                         | <i>P2(1)/c</i>                                  | <i>P2(1)/n</i>                                  | <i>P2(1)/n</i>         | <i>P-1</i>           | <i>Pbam</i>            | <i>Cmca</i>                                                    | <i>Cccm</i>                                                                    | <i>Pnmm</i>                                                     | <i>C2/c</i>                                                   |
| <i>a</i> [Å]                                                                        | 6.6019(4)                                       | 3.5385(2)                                       | 4.1001(4)              | 4.9480(3)            | 6.9541(5)              | 6.6379(5)                                                      | 14.9853(10)                                                                    | 11.2966(9)                                                      | 15.4882(13)                                                   |
| <i>b</i> [Å]                                                                        | 5.0870(3)                                       | 15.1510(12)                                     | 12.9476(11)            | 7.1191(6)            | 13.8119(12)            | 16.5198(14)                                                    | 24.4542(15)                                                                    | 14.7871(13)                                                     | 6.3340(5)                                                     |
| <i>c</i> [Å]                                                                        | 14.9308(9)                                      | 8.3696(6)                                       | 8.1433(8)              | 7.4189(7)            | 4.9030(4)              | 9.1359(7)                                                      | 6.7717(3)                                                                      | 6.9961(5)                                                       | 9.3181(8)                                                     |
| $\alpha$ [°]                                                                        | 90.00                                           | 90.00                                           | 90.00                  | 67.2890(10)          | 90.00                  | 90.00                                                          | 90.00                                                                          | 90.00                                                           | 90.00                                                         |
| $\beta$ [°]                                                                         | 99.846(2)                                       | 94.465(2)                                       | 101.419(2)             | 71.8880(10)          | 90.00                  | 90.00                                                          | 90.00                                                                          | 90.00                                                           | 107.545(2)                                                    |
| $\gamma$ [°]                                                                        | 90.00                                           | 90.00                                           | 90.00                  | 89.451(2)            | 90.00                  | 90.00                                                          | 90.00                                                                          | 90.00                                                           | 90.00                                                         |
| <i>Z</i>                                                                            | 4                                               | 4                                               | 4                      | 2                    | 4                      | 4                                                              | 4                                                                              | 4                                                               | 4                                                             |
| Volume [Å <sup>3</sup> ]                                                            | 494.05(5)                                       | 447.35(5)                                       | 423.74(7)              | 227.30(3)            | 470.93(7)              | 1001.81(14)                                                    | 2481.5(3)                                                                      | 1168.66(16)                                                     | 871.60(13)                                                    |
| $\rho$ [g·cm <sup>-3</sup> ]                                                        | 1.479                                           | 1.872                                           | 1.946                  | 2.492                | 3.074                  | 1.767                                                          | 1.886                                                                          | 1.977                                                           | 2.618                                                         |
| $\mu$ [mm <sup>-1</sup> ]                                                           | 0.129                                           | 0.244                                           | 1.107                  | 10.755               | 7.732                  | 0.218                                                          | 0.575                                                                          | 4.660                                                           | 4.573                                                         |
| <i>F</i> (000)                                                                      | 224                                             | 256                                             | 248                    | 160                  | 392                    | 552                                                            | 1464                                                                           | 696                                                             | 648                                                           |
| $\theta$ min-max [°]                                                                | 2.77 , 25.02                                    | 2.69 , 24.97                                    | 3.00 , 25.00           | 3.16, 25.01          | 2.95, 25.01            | 2.47, 25.01                                                    | 2.84 , 25.02                                                                   | 2.27, 25.01                                                     | 2.76 , 25.02                                                  |
| Dataset (h, k, l)                                                                   | -7:7,-6:5, -<br>17:15                           | -4:4, -18:13, -<br>9:9                          | -4:4, -15:11, -<br>9:9 | -5:5, -8:7, -8:8     | -8:8, -16:11, -<br>5:5 | -6:7, -14:19, -<br>10:7                                        | -13:17, -27:29, -<br>8:8                                                       | -13:13, -12:17, -<br>8:8                                        | -18:17, -7:7,<br>0:10                                         |
| Reflect. coll.                                                                      | 2272                                            | 2125                                            | 2015                   | 1157                 | 2125                   | 1997                                                           | 1171                                                                           | 5475                                                            | 769                                                           |
| Independ. refl.                                                                     | 863                                             | 782                                             | 739                    | 787                  | 471                    | 486                                                            | 1171                                                                           | 1125                                                            | 769                                                           |
| <i>R</i> <sub>int</sub>                                                             | 0.0393                                          | 0.0564                                          | 0.0365                 | 0.0945               | 0.0636                 | 0.0808                                                         | 0.0000                                                                         | 0.0717                                                          | 0.0000                                                        |
| No. parameters                                                                      | 74                                              | 74                                              | 64                     | 64                   | 55                     | 64                                                             | 148                                                                            | 103                                                             | 70                                                            |
| <i>R</i> <sub>1</sub> / <i>wR</i> <sub>2</sub> (all data)                           | 0.0614/0.1339                                   | 0.0471/0.1289                                   | 0.0449/0.0753          | 0.1312/0.3099        | 0.0552/0.1213          | 0.0550/0.1401                                                  | 0.1415/0.3075                                                                  | 0.0369/0.0747                                                   | 0.0422/0.0931                                                 |
| <i>R</i> <sub>1</sub> / <i>wR</i> <sub>2</sub> ( <i>I</i> >2 $\sigma$ ( <i>I</i> )) | 0.0510/0.1296                                   | 0.0426/0.1241                                   | 0.0307/0.0708          | 0.1203/0.2972        | 0.0499/0.1190          | 0.0501/0.1354                                                  | 0.1290/0.2995                                                                  | 0.0310/0.0722                                                   | 0.0394/0.0925                                                 |
| <i>S</i>                                                                            | 1.163                                           | 1.092                                           | 1.079                  | 1.368                | 1.155                  | 1.109                                                          | 1.091                                                                          | 1.014                                                           | 1.151                                                         |
| CCDC number                                                                         | 1018902                                         | 1018900                                         | 1018911                | 1018907              | 1018908                | 1018915                                                        | 1018917                                                                        | 1018916                                                         | 1018912                                                       |

## 4. Hydrogen bonds

**Table S2a** Hydrogen bonds for compound **1** [Å and °]

|             | Donor-H | Acceptor-H | Donor-Acceptor | Angle  |
|-------------|---------|------------|----------------|--------|
| N1--H1··N3  | 0.8600  | 2.1300     | 2.968(3)       | 166.00 |
| O2--H2B··O2 | 0.8500  | 2.1100     | 2.945(3)       | 167.00 |
| O2--H2C··N2 | 0.8500  | 2.0500     | 2.903(3)       | 179.00 |
| O2--H2D··O2 | 0.8500  | 2.1000     | 2.945(3)       | 178.00 |

**Table S2b** Hydrogen bonds for compound **2** [Å and °]

|             | Donor-H | Acceptor-H | Donor-Acceptor | Angle  |
|-------------|---------|------------|----------------|--------|
| N1--H1··N3  | 0.8600  | 1.9800     | 2.840(3)       | 174.00 |
| O2--H2A··N3 | 0.8500  | 2.3800     | 3.228(2)       | 174.00 |
| O2--H2A··N4 | 0.8500  | 2.3600     | 3.117(2)       | 148.00 |
| O2--H2B··N4 | 0.8500  | 2.1500     | 2.834(3)       | 137.00 |

**Table S2c** Hydrogen bonds for compound **3** [Å and °]

|            | Donor-H | Acceptor-H | Donor-Acceptor | Angle  |
|------------|---------|------------|----------------|--------|
| N5--H4··N1 | 0.8600  | 1.9500     | 2.800(3)       | 173.00 |

**Table S2d** Hydrogen bonds for compound **4** [Å and °]

|            | Donor-H | Acceptor-H | Donor-Acceptor | Angle  |
|------------|---------|------------|----------------|--------|
| N1--H1··N4 | 0.8600  | 1.9700     | 2.80(2)        | 161.00 |

**Table S2f** Hydrogen bonds for compound **6** [Å and °]

|             | Donor-H | Acceptor-H | Donor-Acceptor | Angle  |
|-------------|---------|------------|----------------|--------|
| N1--H1··N3  | 0.8600  | 2.0600     | 2.843(4)       | 151.00 |
| O2--H2C··N2 | 0.8500  | 2.0600     | 2.912(4)       | 179.00 |
| O2--H2C··N3 | 0.8500  | 2.4400     | 3.188(4)       | 148.00 |
| O2--H2D··N4 | 0.8500  | 2.0700     | 2.918(4)       | 179.00 |

**Table S2g** Hydrogen bonds for compound **7** [Å and °]

|             | Donor-H  | Acceptor-H | Donor-Acceptor | Angle  |
|-------------|----------|------------|----------------|--------|
| N1--H1··O1  | 0.8600   | 1.9200     | 2.769(14)      | 170.00 |
| O4--H4··O2  | 0.67(12) | 2.18(12)   | 2.848(10)      | 173.00 |
| O5--H5C··O1 | 0.8500   | 1.9100     | 2.751(11)      | 170.00 |

|             |        |        |           |        |
|-------------|--------|--------|-----------|--------|
| O5--H5D··N5 | 0.8500 | 2.2100 | 3.047(11) | 171.00 |
| O6--H6B··O2 | 0.8500 | 2.0300 | 2.872(11) | 173.00 |
| O6--H6C··N4 | 0.8500 | 2.3100 | 3.151(12) | 170.00 |
| N8--H8··O3  | 0.8600 | 1.9300 | 2.72(3)   | 152.00 |
| N8--H8··O7  | 0.8600 | 2.1700 | 2.97(3)   | 155.00 |
| N8--H8··N11 | 0.8600 | 1.9800 | 2.84(4)   | 179.00 |
| N8--H8··N11 | 0.8600 | 1.9800 | 2.84(4)   | 179.00 |
| O7--H9··N3  | 1.0100 | 1.9600 | 2.84(3)   | 145.00 |

**Table S2h** Hydrogen bonds for compound **8** [Å and °]

|             | Donor-H | Acceptor-H | Donor-Acceptor | Angle  |
|-------------|---------|------------|----------------|--------|
| N1--H1··O1  | 0.8600  | 1.9400     | 2.793(4)       | 169.00 |
| O3--H3··N8  | 0.8500  | 2.2800     | 3.130(3)       | 178.00 |
| O4--H4C··N7 | 0.8500  | 2.1700     | 3.012(3)       | 171.00 |
| O4--H4D··O1 | 0.8500  | 1.9500     | 2.795(3)       | 171.00 |
| N5--H5··O2  | 0.8600  | 1.9400     | 2.793(4)       | 171.00 |
| O5--H5C··O2 | 0.8500  | 1.9300     | 2.778(3)       | 173.00 |
| O5--H5D··N4 | 0.8500  | 2.3200     | 3.167(3)       | 173.00 |

**Table S2i** Hydrogen bonds for compound **9** [Å and °]

|            | Donor-H | Acceptor-H | Donor-Acceptor | Angle  |
|------------|---------|------------|----------------|--------|
| N4--H4··N1 | 0.8600  | 1.8700     | 2.682(10)      | 156.00 |

## 5. References

1. G. M. Sheldrick, *SHELXS-97, Program for the Solution of Crystal Structure*, University of Göttingen, Göttingen (Germany), 1997.
2. G. M. Sheldrick, *SHELXL-97, Program for Crystal Structure Refinement from Diffraction Data*, University of Göttingen, Göttingen (Germany), 1997.
